# Supplementary material for: Arboviral disease outbreaks, Aedes mosquitoes, and vector control efforts in the Pacific
Source: Frontiers journal article supplement (doi:10.3389/fitd.2023.1035273), 2023-01-25
Supplement: Data_Sheet_1.XLSX [file Data_Sheet_1.XLSX]

## Sheet: Distribution
Pacific countries and territories (PICTs)	Vectors	Records	Sources
American Samoa	Ae. aegypti	O	Kraemer MUG, Sinka ME, Duda KA, Mylne A, Shearer FM, Brady OJ, et al. (2017). Data from: The global compendium of Aedes aegypti and Ae. albopictus occurrence, Dryad, Dataset, https://doi.org/10.5061/dryad.47v3c
American Samoa	Ae. albopictus	X	Guillaumot L, Ofanoa R, Swillen L, Singh N, Bossin HC, Schaffner F. Distribution of Aedes albopictus (Diptera, Culicidae) in southwestern Pacific countries, with a first report from the Kingdom of Tonga. Parasites Vectors (2012) 5:247. doi: 10.1186/1756-3305-5-247
Austrailia	Ae. aegypti	O	Schmidt TL, Chung J, Honnen AC, Weeks AR, Hoffmann AA. Population genomics of two invasive mosquitoes (Aedes aegypti and Aedes albopictus) from the Indo-Pacific. PLoS Negl Trop Dis (2020) 14(7):30008463. doi: 10.1371/journal.pntd.0008463
Austrailia	Ae. albopictus	O	Kraemer MUG, Sinka ME, Duda KA, Mylne A, Shearer FM, Brady OJ, et al. (2017). Data from: The global compendium of Aedes aegypti and Ae. albopictus occurrence, Dryad, Dataset, https://doi.org/10.5061/dryad.47v3c
Cook Islands	Ae. aegypti	O	Kraemer MUG, Sinka ME, Duda KA, Mylne A, Shearer FM, Brady OJ, et al. (2017). Data from: The global compendium of Aedes aegypti and Ae. albopictus occurrence, Dryad, Dataset, https://doi.org/10.5061/dryad.47v3c
Cook Islands	Ae. albopictus	X	Guillaumot L, Ofanoa R, Swillen L, Singh N, Bossin HC, Schaffner F. Distribution of Aedes albopictus (Diptera, Culicidae) in southwestern Pacific countries, with a first report from the Kingdom of Tonga. Parasites Vectors (2012) 5:247. doi: 10.1186/1756-3305-5-247
Easter Island	Ae. aegypti	O	Perret C, Abarca K, Ovalle J, Ferrer P, Godoy P, Olea A, et al. Dengue-1 virus isolation during first dengue fever outbreak on Easter Island, Chile. Emerg Infect Dis (2003) 9(11):1465–7. doi: 10.3201/eid0911.020788
Easter Island	Ae. albopictus
Federated States of Micronesia	Ae. aegypti	O	Noda S, Yamamoto S, Toma T. Mosquitoes collected on Pohnpei Island, Mokil Atoll and Pingelap Atoll, Pohnpei State, the Federated States of Micronesia (Diptera: Culicidae). Med Entomol Zool (2013) 64(4):197–201. doi: 10.7601/mez.64.197
Federated States of Micronesia	Ae. albopictus	O	Noda S, Yamamoto S, Toma T. Mosquitoes collected on Pohnpei Island, Mokil Atoll and Pingelap Atoll, Pohnpei State, the Federated States of Micronesia (Diptera: Culicidae). Med Entomol Zool (2013) 64(4):197–201. doi: 10.7601/mez.64.197
Fiji	Ae. aegypti	O	Schmidt TL, Chung J, Honnen AC, Weeks AR, Hoffmann AA. Population genomics of two invasive mosquitoes (Aedes aegypti and Aedes albopictus) from the Indo-Pacific. PLoS Negl Trop Dis (2020) 14(7):30008463. doi: 10.1371/journal.pntd.0008463
Fiji	Ae. albopictus	O	Schmidt TL, Chung J, Honnen AC, Weeks AR, Hoffmann AA. Population genomics of two invasive mosquitoes (Aedes aegypti and Aedes albopictus) from the Indo-Pacific. PLoS Negl Trop Dis (2020) 14(7):30008463. doi: 10.1371/journal.pntd.0008463
French polynesia	Ae. aegypti	O	Guillaumot L, Ofanoa R, Swillen L, Singh N, Bossin HC, Schaffner F. Distribution of Aedes albopictus (Diptera, Culicidae) in southwestern Pacific countries, with a first report from the Kingdom of Tonga. Parasites Vectors (2012) 5:247. doi: 10.1186/1756-3305-5-247
French polynesia	Ae. albopictus	X	Asigau S, Hartman DA, Higashiguchi JM, Parker PG. The distribution of mosquitoes across an altitudinal gradient in the Galapagos Islands. J Vector Ecol (2017) 42(2):243-253. doi: 10.1111/jvec.12264
Guam	Ae. aegypti	X	Personal communication with Limb Hapairai from Pacific Island Health Officers Association (PIHOA)
Guam	Ae. albopictus	O	Kraemer MUG, Sinka ME, Duda KA, Mylne A, Shearer FM, Brady OJ, et al. (2017). Data from: The global compendium of Aedes aegypti and Ae. albopictus occurrence, Dryad, Dataset, https://doi.org/10.5061/dryad.47v3c
Hawaii	Ae. aegypti	O	Personal observation of Christoper Jacobseon from Hawaii Department of Health
Hawaii	Ae. albopictus	O	Personal observation of Christoper Jacobseon from Hawaii Department of Health
Kiribati	Ae. aegypti	O	Schmidt TL, Chung J, Honnen AC, Weeks AR, Hoffmann AA. Population genomics of two invasive mosquitoes (Aedes aegypti and Aedes albopictus) from the Indo-Pacific. PLoS Negl Trop Dis (2020) 14(7):30008463. doi: 10.1371/journal.pntd.0008463
Kiribati	Ae. albopictus	O	Pacific Community, World Health Organization. Manual for Surveillance and Control of Aedes Vectors in the Pacific (2020). Pacific Community and World Health Organization.
Nauru	Ae. aegypti	O	Kraemer MUG, Sinka ME, Duda KA, Mylne A, Shearer FM, Brady OJ, et al. (2017). Data from: The global compendium of Aedes aegypti and Ae. albopictus occurrence, Dryad, Dataset, https://doi.org/10.5061/dryad.47v3c
Nauru	Ae. albopictus	O	Maynard AJ, Ambrose L, Cooper RD, Chow WK, Davis JB, Muzari MO, et al. Tiger on the prowl: invasion history and spatio-temporal genetic structure of the Asian tiger mosquito Aedes albopictus (Skuse 1894) in the Indo-Pacific. PLoS Negl Trop Dis (2017) 11(4):e0005546. doi: 10.1371/journal.pntd.0005546
New Caledonia	Ae. aegypti	O	Schmidt TL, Chung J, Honnen AC, Weeks AR, Hoffmann AA. Population genomics of two invasive mosquitoes (Aedes aegypti and Aedes albopictus) from the Indo-Pacific. PLoS Negl Trop Dis (2020) 14(7):30008463. doi: 10.1371/journal.pntd.0008463
New Caledonia	Ae. albopictus	X	Guillaumot L, Ofanoa R, Swillen L, Singh N, Bossin HC, Schaffner F. Distribution of Aedes albopictus (Diptera, Culicidae) in southwestern Pacific countries, with a first report from the Kingdom of Tonga. Parasites Vectors (2012) 5:247. doi: 10.1186/1756-3305-5-247
New Zealand	Ae. aegypti
New Zealand	Ae. albopictus
Niue	Ae. aegypti	O	Kraemer MUG, Sinka ME, Duda KA, Mylne A, Shearer FM, Brady OJ, et al. (2017). Data from: The global compendium of Aedes aegypti and Ae. albopictus occurrence, Dryad, Dataset, https://doi.org/10.5061/dryad.47v3c
Niue	Ae. albopictus
Northern Mariana Islands	Ae. aegypti	X	Personal communication with Limb Hapairai from Pacific Island Health Officers Association (PIHOA)
Northern Mariana Islands	Ae. albopictus	O	Kraemer MUG, Sinka ME, Duda KA, Mylne A, Shearer FM, Brady OJ, et al. (2017). Data from: The global compendium of Aedes aegypti and Ae. albopictus occurrence, Dryad, Dataset, https://doi.org/10.5061/dryad.47v3c
Palau	Ae. aegypti	O	Ashford DA, Savage HM, Hajjeh RA, McReady J, Bartholomew DM, Spiegel RA, et al. Outbreak of dengue fever in Palau, Western Pacific: risk factors for infection. Am J Trop Med Hyg (2003) 69(2):135–40.
Palau	Ae. albopictus	O	Ashford DA, Savage HM, Hajjeh RA, McReady J, Bartholomew DM, Spiegel RA, et al. Outbreak of dengue fever in Palau, Western Pacific: risk factors for infection. Am J Trop Med Hyg (2003) 69(2):135–40.
Papua New Guinea	Ae. aegypti	O	Kraemer MUG, Sinka ME, Duda KA, Mylne A, Shearer FM, Brady OJ, et al. (2017). Data from: The global compendium of Aedes aegypti and Ae. albopictus occurrence, Dryad, Dataset, https://doi.org/10.5061/dryad.47v3c
Papua New Guinea	Ae. albopictus	O	Kraemer MUG, Sinka ME, Duda KA, Mylne A, Shearer FM, Brady OJ, et al. (2017). Data from: The global compendium of Aedes aegypti and Ae. albopictus occurrence, Dryad, Dataset, https://doi.org/10.5061/dryad.47v3c
Pitcairn Islands	Ae. aegypti	O	Pacific Community, World Health Organization. Manual for Surveillance and Control of Aedes Vectors in the Pacific (2020). Pacific Community and World Health Organization.
Pitcairn Islands	Ae. albopictus
Republic of Marshall Islands	Ae. aegypti	O	Kraemer MUG, Sinka ME, Duda KA, Mylne A, Shearer FM, Brady OJ, et al. (2017). Data from: The global compendium of Aedes aegypti and Ae. albopictus occurrence, Dryad, Dataset, https://doi.org/10.5061/dryad.47v3c
Republic of Marshall Islands	Ae. albopictus	O	Kraemer MUG, Sinka ME, Duda KA, Mylne A, Shearer FM, Brady OJ, et al. (2017). Data from: The global compendium of Aedes aegypti and Ae. albopictus occurrence, Dryad, Dataset, https://doi.org/10.5061/dryad.47v3c
Samoa	Ae. aegypti	O	Kraemer MUG, Sinka ME, Duda KA, Mylne A, Shearer FM, Brady OJ, et al. (2017). Data from: The global compendium of Aedes aegypti and Ae. albopictus occurrence, Dryad, Dataset, https://doi.org/10.5061/dryad.47v3c
Samoa	Ae. albopictus	O	Pacific Community, World Health Organization. Manual for Surveillance and Control of Aedes Vectors in the Pacific (2020). Pacific Community and World Health Organization.
Solomon Islands	Ae. aegypti	O	Kraemer MUG, Sinka ME, Duda KA, Mylne A, Shearer FM, Brady OJ, et al. (2017). Data from: The global compendium of Aedes aegypti and Ae. albopictus occurrence, Dryad, Dataset, https://doi.org/10.5061/dryad.47v3c
Solomon Islands	Ae. albopictus	O	Elliott SA. Aedes albopictus in the Solomon and Santa Cruz Islands, South Pacific. Trans R Soc Trop Med Hyg (1980) 74(6):747–8. doi: 10.1016/0035-9203(80)90192-3
Tokelau	Ae. aegypti	O	Kraemer MUG, Sinka ME, Duda KA, Mylne A, Shearer FM, Brady OJ, et al. (2017). Data from: The global compendium of Aedes aegypti and Ae. albopictus occurrence, Dryad, Dataset, https://doi.org/10.5061/dryad.47v3c
Tokelau	Ae. albopictus
Tonga	Ae. aegypti	O	Kraemer MUG, Sinka ME, Duda KA, Mylne A, Shearer FM, Brady OJ, et al. (2017). Data from: The global compendium of Aedes aegypti and Ae. albopictus occurrence, Dryad, Dataset, https://doi.org/10.5061/dryad.47v3c
Tonga	Ae. albopictus	O	Guillaumot L, Ofanoa R, Swillen L, Singh N, Bossin HC, Schaffner F. Distribution of Aedes albopictus (Diptera, Culicidae) in southwestern Pacific countries, with a first report from the Kingdom of Tonga. Parasites Vectors (2012) 5:247. doi: 10.1186/1756-3305-5-247
Tuvalu	Ae. aegypti	O	Kraemer MUG, Sinka ME, Duda KA, Mylne A, Shearer FM, Brady OJ, et al. (2017). Data from: The global compendium of Aedes aegypti and Ae. albopictus occurrence, Dryad, Dataset, https://doi.org/10.5061/dryad.47v3c
Tuvalu	Ae. albopictus
Vanuatu	Ae. aegypti	O	Schmidt TL, Chung J, Honnen AC, Weeks AR, Hoffmann AA. Population genomics of two invasive mosquitoes (Aedes aegypti and Aedes albopictus) from the Indo-Pacific. PLoS Negl Trop Dis (2020) 14(7):30008463. doi: 10.1371/journal.pntd.0008463
Vanuatu	Ae. albopictus	O	Schmidt TL, Chung J, Honnen AC, Weeks AR, Hoffmann AA. Population genomics of two invasive mosquitoes (Aedes aegypti and Aedes albopictus) from the Indo-Pacific. PLoS Negl Trop Dis (2020) 14(7):30008463. doi: 10.1371/journal.pntd.0008463
Wallis and Futuna	Ae. aegypti	O	Calvez E, Pocquet N, Malau A, Kilama S, Taugamoa A, Labrousse D, et al. Assessing entomological risk factors for arboviral disease transmission in the French Territory of the Wallis and Futuna Islands. PLoS Negl Trop Dis (2020) 14(5):e0008250. doi: 10.1371/journal.pntd.0008250
Wallis and Futuna	Ae. albopictus	X	Guillaumot L, Ofanoa R, Swillen L, Singh N, Bossin HC, Schaffner F. Distribution of Aedes albopictus (Diptera, Culicidae) in southwestern Pacific countries, with a first report from the Kingdom of Tonga. Parasites Vectors (2012) 5:247. doi: 10.1186/1756-3305-5-247

## Sheet: Aedes albopictus
Pacific countries and territories (PICTs)	Island	Latitude	Longitude	Note
Australia		-9.95	142.18
Australia		-9.92	144.06
Australia		-9.76	143.42
Australia		-9.6	143.77
Australia		-9.42	142.54
Federated of States of Micronesi	Kahalp	6.69267	159.764	estimated coordinate
Federated of States of Micronesi	Pohnpei	6.96744	158.208	estimated coordinate
Fiji	Viti Levu	-18.15	178.43
Fiji	Viti Levu	-17.61	177.46
Fiji	Viti Levu	-17.8	178
Fiji	Taveuni	-16.82	179.97
Fiji	Vauna Levu	-16.58	179.18
Fiji	Viti Levu	-17.8	177.42
Fiji	Viti Levu	-17.76	177.45
Fiji	Viti Levu	-17.76	177.44
Fiji	Viti Levu	-18.12	178.43
Guam		13.44	144.79
Hawaii	Big island	19.0852	-155.551	C Jacobsen
Hawaii	Big island	19.1301	-155.512	C Jacobsen
Hawaii	Big island	19.1361	-155.503	C Jacobsen
Hawaii	Big island	19.211	-155.868	C Jacobsen
Hawaii	Big island	19.3213	-156.04	C Jacobsen
Hawaii	Big island	19.3616	-154.971	C Jacobsen
Hawaii	Big island	19.3944	-154.93	C Jacobsen
Hawaii	Big island	19.4092	-154.924	C Jacobsen
Hawaii	Big island	19.4213	-155.91	C Jacobsen
Hawaii	Big island	19.4225	-155.91	C Jacobsen
Hawaii	Big island	19.4874	-155.906	C Jacobsen
Hawaii	Big island	19.6186	-154.96	C Jacobsen
Hawaii	Big island	19.6706	-156.023	C Jacobsen
Hawaii	Big island	19.6719	-156.02	C Jacobsen
Hawaii	Big island	19.5009	-154.827	C Jacobsen
Kiribati	Tarawa	1.36	173.13
Nauru		-0.547	166.938	estimated coordinate
Northern Mariana Islands	Saipan	15.14	145.72
Palau	Koror	7.34452	134.498	estimated coordinate
Papua New Guinea		-9.48	147.19
Papua New Guinea		-6.72	146.99
Papua New Guinea		-6.12	141.3
Papua New Guinea		-9.08	143.21
Papua New Guinea		-6.12	141.3
Papua New Guinea		-9.09	143.21
Papua New Guinea		-6.12	141.3
Papua New Guinea		-9.27	142.73
Papua New Guinea		-9.15	142.72
Republic of the Marshall Islands	Kwajalein	8.72	167.74	A Vorsino
Republic of the Marshall Islands	Ennugarret	9.38413	167.487	A Vorsino
Republic of the Marshall Islands	Ennylabegan	8.79966	167.613	A Vorsino
Republic of the Marshall Islands	Gellinum	8.98225	167.579	A Vorsino
Republic of the Marshall Islands	Illeginni	9.08615	167.474	A Vorsino
Republic of the Marshall Islands	Kwajalein	8.72261	167.718	A Vorsino
Republic of the Marshall Islands	Legan	8.98258	167.58	A Vorsino
Samoa	Samoa	-13.7833	-172.116	estimated coordinate
Solomon Islands	Guadalcanal	-9.57725	160.135	estimated coordinate
Solomon Islands	Guadalcanal	-9.4409	159.969	estimated coordinate
Tonga	Tongatapu	-21.13	-175.2
Tonga	Tongatapu	-21.15	-175.22
Vanuatu	Efate	-17.66	168.43	estimated coordinate

## Sheet: Aedes aegypti
Pacific countries and territories (PICTs)	Island	Latitude	Longitude	Note
American Samoa	Tutuila	-14.33	-170.73
American Samoa	Tutuila	-14.33	-170.84
American Samoa	Tutuila	-14.32	-170.7
American Samoa	Tutuila	-14.29	-170.66
American Samoa	Tutuila	-14.28	-170.72
American Samoa	Tutuila	-14.28	-170.7
American Samoa	Tutuila	-14.28	-170.69
American Samoa	Tutuila	-14.28	-170.7
American Samoa	Tutuila	-14.27	-170.62
American Samoa	Tutuila	-14.27	-170.58
American Samoa	Tutuila	-14.27	-170.62
American Samoa	Tutuila	-14.26	-170.59
Australia		-33.81	151
Australia		-31.86	115.75
Australia		-26.73	150.62
Australia		-26.57	148.78
Australia		-26.57	148.79
Australia		-26.4	146.23
Australia		-26.19	152.07
Australia		-25.64	149.79
Australia		-25.62	151.6
Australia		-24.88	152.35
Australia		-24.86	151.12
Australia		-24.42	145.47
Australia		-24.4	150.5
Australia		-23.85	151.26
Australia		-23.72	149.67
Australia		-23.65	146.63
Australia		-23.64	150.39
Australia		-23.57	149.07
Australia		-23.55	145.28
Australia		-23.53	148.16
Australia		-23.44	144.24
Australia		-23.38	150.51
Australia		-23.12	150.74
Australia		-23.09	148.02
Australia		-23.08	148.02
Australia		-22.91	139.91
Australia		-22.82	147.63
Australia		-22.82	147.64
Australia		-22.81	149.89
Australia		-22.57	144.54
Australia		-22.39	143.04
Australia		-21.16	149.17
Australia		-21.15	149.17
Australia		-20.85	144.2
Australia		-20.84	144.2
Australia		-20.73	143.14
Australia		-20.72	139.49
Australia		-20.7	140.51
Australia		-20.66	141.75
Australia		-20.55	147.84
Australia		-20.52	145.4
Australia		-20.4	148.58
Australia		-20.1	146.89
Australia		-20.08	146.26
Australia		-20.05	146.25
Australia		-20.01	148.25
Australia		-19.98	148.23
Australia		-19.92	138.12
Australia		-19.91	138.12
Australia		-19.88	146.63
Australia		-19.67	147.41
Australia		-19.65	134.19
Australia		-19.58	147.41
Australia		-19.55	134.23
Australia		-19.35	146.73
Australia		-19.33	146.72
Australia		-19.33	146.82
Australia		-19.32	146.76
Australia		-19.31	146.75
Australia		-19.31	146.73
Australia		-19.3	146.79
Australia		-19.3	146.74
Australia		-19.3	146.81
Australia		-19.3	146.82
Australia		-19.3	146.8
Australia		-19.3	146.79
Australia		-19.3	146.76
Australia		-19.29	146.75
Australia		-19.29	146.78
Australia		-19.29	146.76
Australia		-19.29	146.8
Australia		-19.29	146.77
Australia		-19.28	146.77
Australia		-19.28	146.79
Australia		-19.28	146.82
Australia		-19.28	146.8
Australia		-19.28	146.78
Australia		-19.27	146.76
Australia		-19.27	146.82
Australia		-19.27	146.79
Australia		-19.27	146.78
Australia		-19.26	146.82
Australia		-19.25	146.8
Australia		-19.25	146.81
Australia		-19.24	146.8
Australia		-19.16	146.61
Australia		-19.14	146.84
Australia		-18.65	146.15
Australia		-18.58	143.61
Australia		-18.29	143.55
Australia		-18.27	146.03
Australia		-18.27	146.02
Australia		-17.93	145.92
Australia		-17.87	146.11
Australia		-17.63	145.48
Australia		-17.53	146.03
Australia		-17.52	146.03
Australia		-17.49	140.84
Australia		-17.26	145.48
Australia		-17.23	145.48
Australia		-17.16	144.52
Australia		-17.15	145.82
Australia		-17.15	144.53
Australia		-17.09	145.79
Australia		-17.08	145.78
Australia		-17	145.43
Australia		-16.99	145.42
Australia		-16.96	145.73
Australia		-16.94	145.75
Australia		-16.93	145.76
Australia		-16.93	145.77
Australia		-16.93	145.74
Australia		-16.92	145.77
Australia		-16.92	145.76
Australia		-16.91	145.76
Australia		-16.91	145.74
Australia		-16.9	145.72
Australia		-16.9	145.74
Australia		-16.9	145.73
Australia		-16.89	145.7
Australia		-16.88	145.73
Australia		-16.88	145.71
Australia		-16.87	145.76
Australia		-16.85	145.75
Australia		-16.85	145.74
Australia		-16.81	145.72
Australia		-16.81	145.65
Australia		-16.79	145.69
Australia		-16.49	145.46
Australia		-16.48	145.46
Australia		-16.48	145.47
Australia		-16.46	145.37
Australia		-16.46	145.36
Australia		-16.43	145.41
Australia		-16.35	145.41
Australia		-16.25	145.32
Australia		-13.97	136.45
Australia		-12.2	136.77
Australia		-10.68	142.17
Australia		-10.62	142.17
Australia		-10.61	142.29
Australia		-10.58	142.21
Australia		-10.58	142.22
Australia		-10.56	142.21
Australia		-10.39	142.14
Australia		-10.17	142.25
Australia		-10.12	142.13
Australia		-9.96	142.18
Australia		-9.92	144.05
Australia		-9.9	142.78
Australia		-9.59	143.76
Australia		-9.42	142.53
Australia		-9.4	142.7
Cook Islands	Mangaia	-21.9	-157.96
Cook Islands	Rarotonga	-21.23	-159.77
Easter Island		-27.1503	-109.426	estimated coordinate
Federated of States of Micronesi	Pingelap	6.20962	160.704	estimated coordinate
Fiji	Lakeba	-18.24	-178.81
Fiji	Lakeba	-18.22	-178.8
Fiji	Viti Levu	-18.15	178.43
Fiji	Viti Levu	-18.14	178.44
Fiji	Viti Levu	-18.14	178.43
Fiji	Viti Levu	-18.13	178.43
Fiji	Viti Levu	-18.11	178.41
Fiji	Viti Levu	-17.8	177.42
Fiji	Viti Levu	-17.69	178.81
Fiji	Viti Levu	-17.61	177.46
Fiji	Viti Levu	-17.61	177.45
Fiji	Taveuni	-16.84	-179.98
French Polynesia	Tahiti	-17.85	-149.14
French Polynesia	Tahiti	-17.8	-149.3
French Polynesia	Tahiti	-17.8	-149.29
French Polynesia	Tahiti	-17.76	-149.51
French Polynesia	Tahiti	-17.75	-149.28
French Polynesia	Tahiti	-17.75	-149.16
French Polynesia	Tahiti	-17.75	-149.35
French Polynesia	Tahiti	-17.72	-149.32
French Polynesia	Tahiti	-17.7	-149.57
French Polynesia	Tahiti	-17.68	-149.31
French Polynesia	Tahiti	-17.68	-149.58
French Polynesia	Tahiti	-17.67	-149.59
French Polynesia	Tahiti	-17.65	-149.32
French Polynesia	Tahiti	-17.64	-149.6
French Polynesia	Tahiti	-17.61	-149.31
French Polynesia	Tahiti	-17.58	-149.82
French Polynesia	Tahiti	-17.57	-149.61
French Polynesia	Tahiti	-17.57	-149.85
French Polynesia	Tahiti	-17.55	-149.6
French Polynesia	Tahiti	-17.55	-149.34
French Polynesia	Tahiti	-17.54	-149.57
French Polynesia	Tahiti	-17.53	-149.57
French Polynesia	Tahiti	-17.53	-149.53
French Polynesia	Tahiti	-17.53	-149.54
French Polynesia	Tahiti	-17.53	-149.56
French Polynesia	Moorea	-17.52	-149.78
French Polynesia	Moorea	-17.52	-149.85
French Polynesia	Moorea	-17.51	-149.44
French Polynesia	Moorea	-17.51	-149.43
French Polynesia	Moorea	-17.51	-149.83
French Polynesia	Moorea	-17.51	-149.49
French Polynesia	Moorea	-17.5	-149.83
French Polynesia	Moorea	-17.5	-149.84
French Polynesia	Moorea	-17.48	-149.78
French Polynesia	Raiatea	-16.84	-151.48
French Polynesia	Raiatea	-16.8	-151.44
French Polynesia	Huahine	-16.71	-151.03
French Polynesia	Bora Bora	-16.5	-151.74
French Polynesia	Tuamotus	-15.48	-145.43
French Polynesia	Tikehau	-15.12	-148.23
French Polynesia	Rangiroa	-14.93	-147.71
French Polynesia	Ua Huka	-8.95	-139.5
Galapagos	Isabela	-0.95	-90.97
Galapagos	Santa Cruz	-0.74	-90.3
Hawaii	Big island	19.0844	-155.776	C Jacobsen
Hawaii	Big island	19.0853	-155.776	C Jacobsen
Hawaii	Big island	19.1049	-155.819	C Jacobsen
Hawaii	Big island	19.1858	-155.907	C Jacobsen
Hawaii	Big island	19.1873	-155.906	C Jacobsen
Hawaii	Big island	19.1893	-155.905	C Jacobsen
Hawaii	Big island	19.1937	-155.905	C Jacobsen
Hawaii	Big island	19.2122	-155.867	C Jacobsen
Hawaii	Big island	19.4213	-155.91	C Jacobsen
Hawaii	Big island	19.5969	-154.938	C Jacobsen
Hawaii	Big island	20.023	-155.761	C Jacobsen
Hawaii	Big island	20.037	-156.826	C Jacobsen
Hawaii	Big island	20.0383	-155.827	C Jacobsen
Hawaii	Big island	20.0403	-155.832	C Jacobsen
Hawaii	Big island	20.0456	-155.836	C Jacobsen
Hawaii	Big island	20.058	-155.842	C Jacobsen
Hawaii	Big island	20.1823	-155.901	C Jacobsen
Kiribati	Tarawa	1.35	172.93
Kiribati	Tarawa	1.36	173.15
Kiribati	Tarawa	1.36	173.13
Nauru		-0.52	166.93
Nauru		-0.52	166.92
New Caledonia		-22.3	166.45
New Caledonia		-22.3	166.44
New Caledonia		-22.28	166.46
New Caledonia		-22.27	166.45
New Caledonia		-22.26	166.45
New Caledonia		-22.23	166.44
New Caledonia		-22.01	166.21
New Caledonia		-21.64	166.2
New Caledonia		-21.61	166.2
New Caledonia		-21.61	166.22
New Caledonia		-21.57	165.48
New Caledonia		-21.4	165.82
New Caledonia		-21.3	165.66
New Caledonia		-21.13	164.89
New Caledonia		-21.06	164.85
New Caledonia	Loyalty	-20.66	166.54
New Caledonia	Loyalty	-20.6	166.57
New Caledonia	Loyalty	-20.45	166.6
New Caledonia	Loyalty	-20.41	166.61
Niue		-19.06	-169.87
Palau	Peleliu	7.00256	134.234	estimated coordinate
Palau	Koror	7.34394	134.498	estimated coordinate
Papua New Guinea		-9.48	147.19
Papua New Guinea		-9.32	142.6
Papua New Guinea		-3.63	143.05
Papua New Guinea		-3.55	143.63
Pitcairn Islands	Pitcairn	-25.0707	-130.105
Republic of the Marshall Islands	Majuro	7.12	171.06
Republic of the Marshall Islands	Majuro	7.12	171.37
Samoa	Upolu	-14	-171.82
Samoa	Upolu	-13.91	-171.73
Samoa	Upolu	-13.9	-171.57
Samoa	Upolu	-13.88	-171.63
Samoa	Upolu	-13.84	-172.1
Samoa	Upolu	-13.84	-172.08
Samoa	Upolu	-13.83	-171.98
Samoa	Upolu	-13.83	-171.75
Samoa	Samoa	-13.72	-172.21
Samoa	Samoa	-13.68	-172.19
Samoa	Samoa	-13.66	-172.43
Samoa	Samoa	-13.63	-172.62
Solomon Islands	Rennell	-11.56	160.07
Solomon Islands	Guadalcanal	-9.58	160.15
Solomon Islands	Guadalcanal	-9.43	160.05
Tokelau	Fakaofo	-9.37	-171.22
Tokelau	Nukunonu	-9.2	-171.85
Tokelau	Atafu	-8.56	-172.5
Tonga	Tongatapu	-21.15	-175.22
Tonga	Tongatapu	-21.14	-175.22
Tonga	Tongatapu	-21.13	-175.2
Tuvalu	Niuoko	-9.42	179.86
Tuvalu	Fongafale	-8.51	179.19
Tuvalu	Vaitupu	-7.49	178.68
Vanuatu	Efate	-17.74	168.32
Vanuatu	Ambrym	-16.25	168.16	estimated coordinate
Vanuatu	Espiritu	-15.51	167.21	estimated coordinate
Wallis and Futuna	Alofi	-14.3285	-178.059	estimated coordinate
Wallis and Futuna	Futuna	-14.3119	-178.082
Wallis and Futuna	Wallis	-13.2814	-176.176
